# Supplementary material for: Differences in the Expression Levels of SARS-CoV-2 Spike Protein in Cells Treated with mRNA-Based COVID-19 Vaccines: A Study on Vaccines from the Real World
Source: MDPI journal article supplement (doi:10.3390/vaccines11040879), 2023-04-21
Supplement: s1 [file s1]

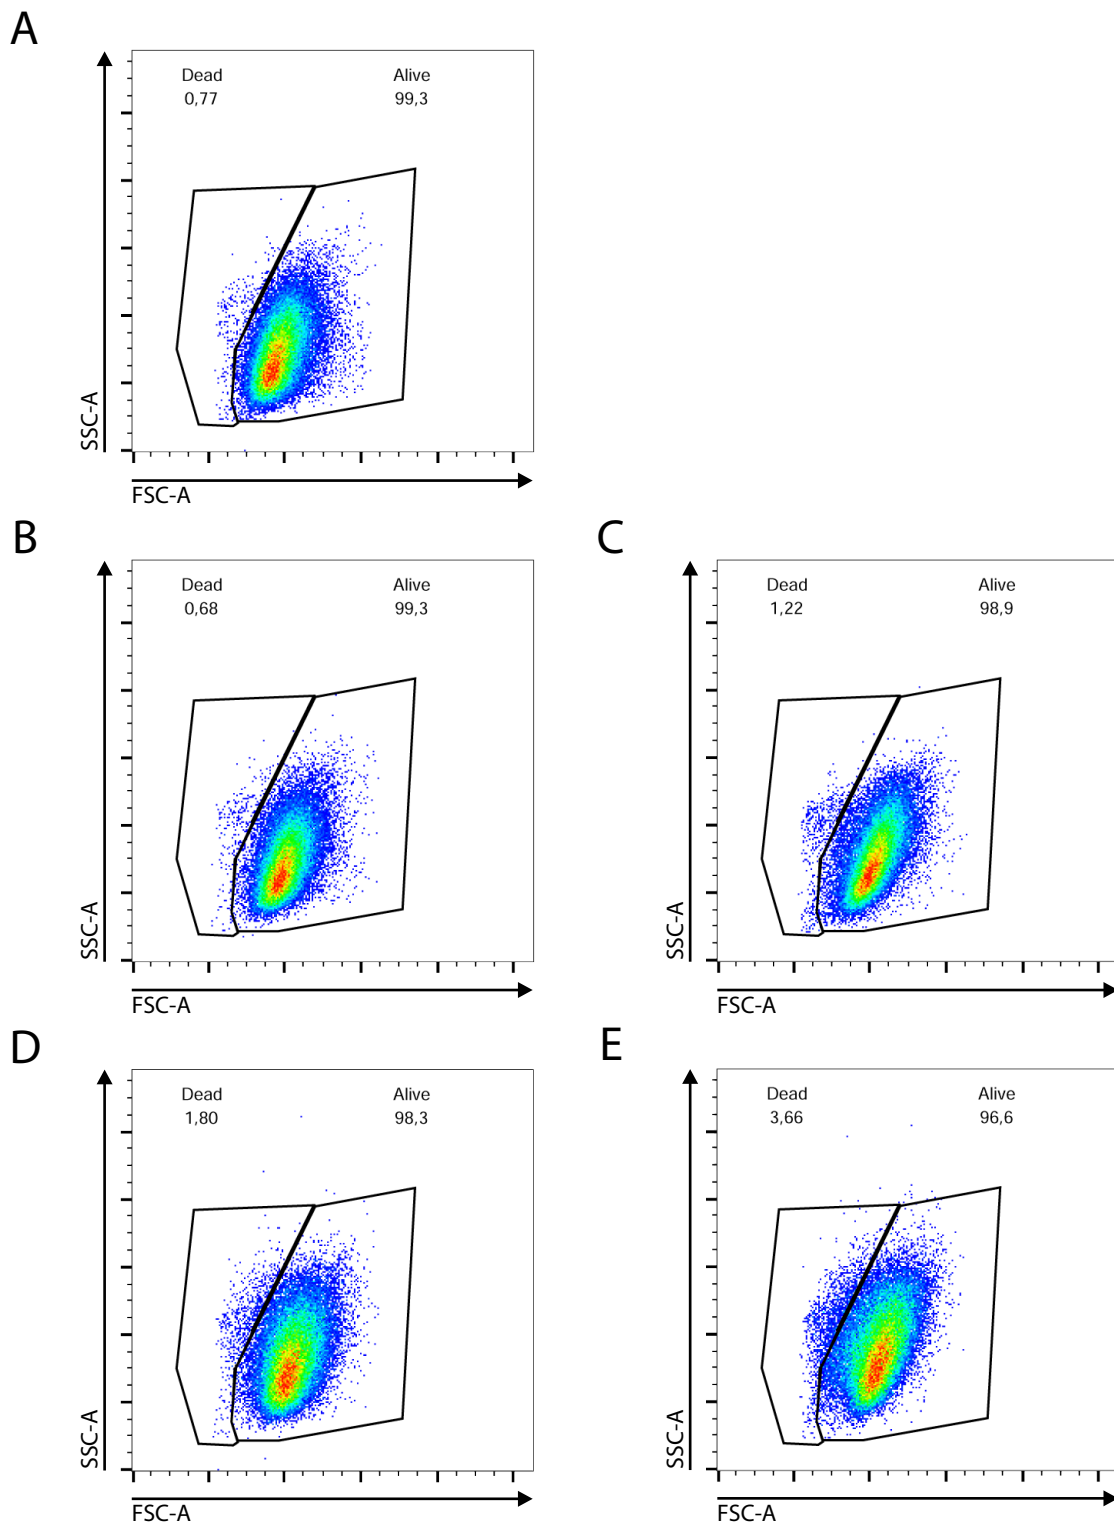

**Figure S1. Flow cytometric analysis of Jurkat cell line treated with mRNA-based COVID-19 vaccines**

SSC and FSC parameters of untreated (panel A), 1  $\mu$ l and 10  $\mu$ l Comirnaty-treated (panels B and C, respectively) and 1  $\mu$ l and 10  $\mu$ l Spikevax-treated (panels E and F, respectively) Jurkat cells (representative experiment). The percentage of dead and alive cells is reported.

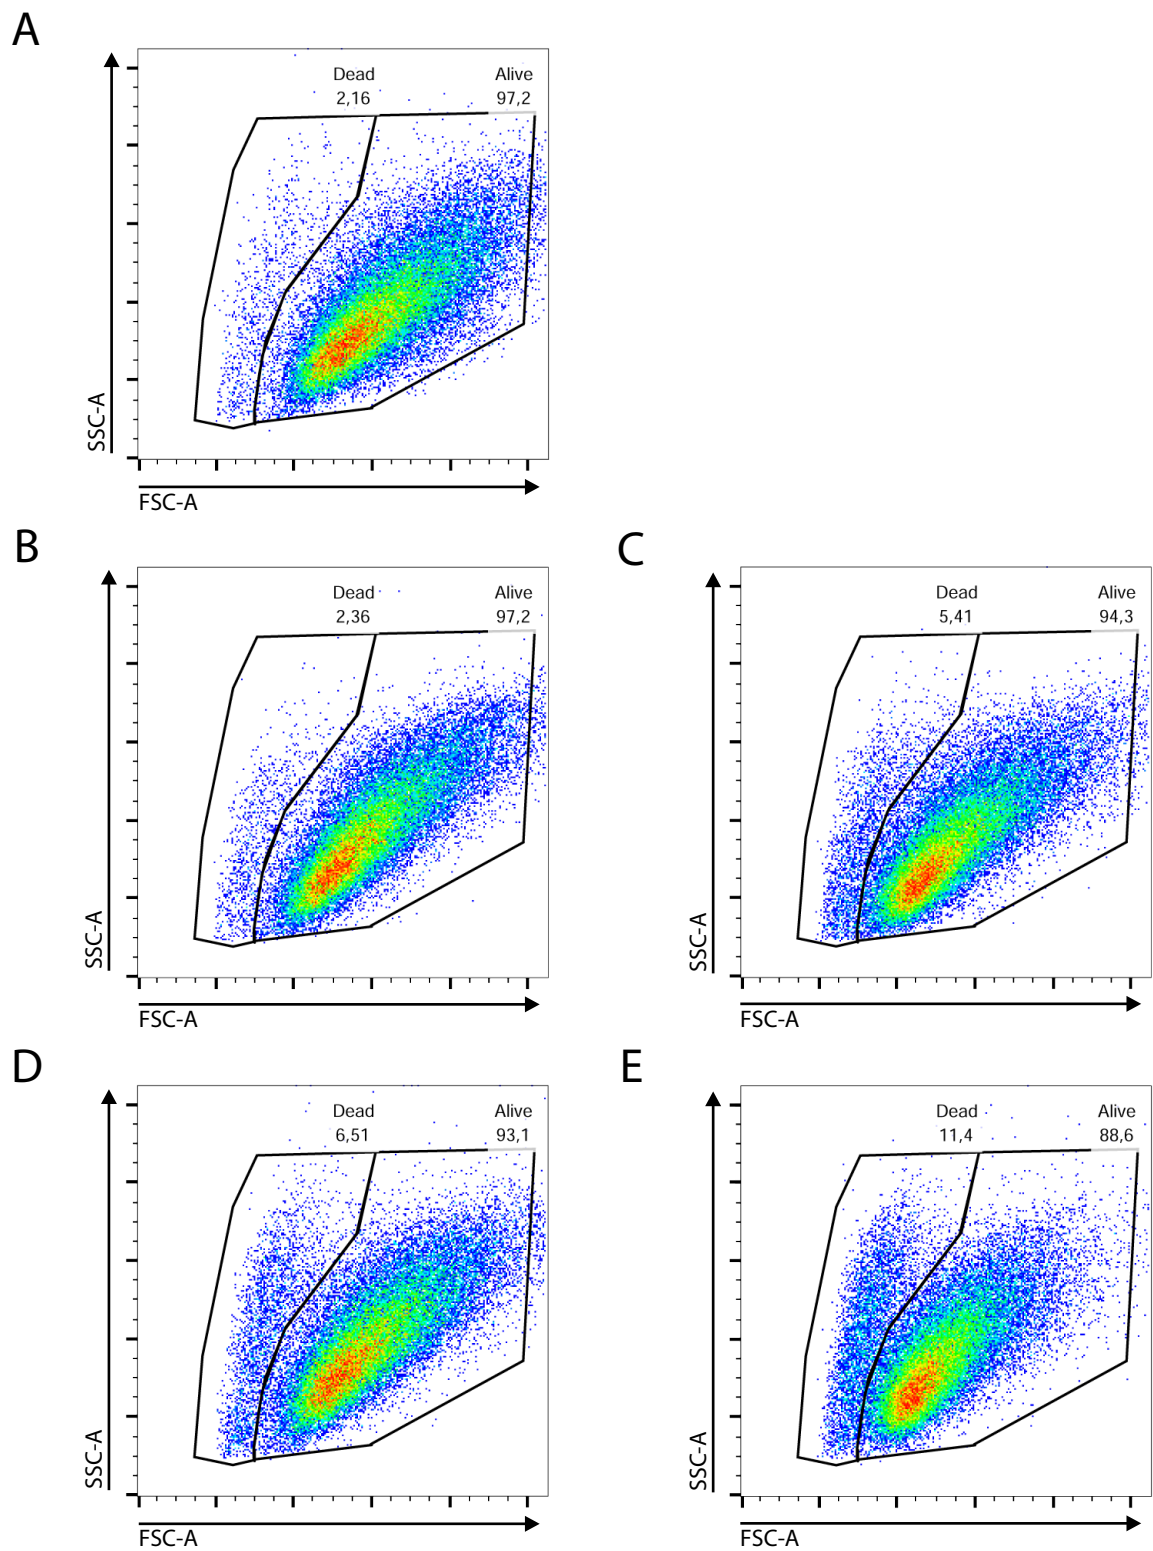

**Figure S2. Flow cytometric analysis of K562 cell line treated with mRNA-based COVID-19 vaccines**

SSC and FSC parameters of untreated (panel A), 1  $\mu$ l and 10  $\mu$ l Comirnaty-treated (panels B and C, respectively) and 1  $\mu$ l and 10  $\mu$ l Spikevax-treated (panels E and F, respectively) K562 cells (representative experiment). The percentage of dead and alive cells is reported.
